# Supplementary material for: Assessment of the factors influencing primary care physicians’ approach to vaccination of adult risk groups in Istanbul, Turkey
Source: PeerJ. 2019 Aug 15;7:e7516. doi: 10.7717/peerj.7516 (PMC6698375; doi:10.7717/peerj.7516)
Supplement: Supplemental Information 1 [file peerj-07-7516-s001.xlsx]

## Sheet: Sheet1
Gender	Age	Experience	Speciality	number patients with follow-up	visit ≥ 18 years	visit ≥ 65 years	visit risk group	following regulations of the Ministry of Health	Have you been vaccinated for tetanus ?	Have you been vaccinated for ınfluenza in this year	Have you been vaccinated for Hepatitis B ?
0	4	5	2	4	20	10	10	0	2	1	1
1	3	4	2	3	35	6	5	1	2	1	2
1	3	4	2	4	15	5	5	1	1	2	2
1	3	3	2	4	35	10	5	1	2	2	1
1	3	2	2	3	20	10	14	1	1	2	3
1	2	2	2	3	40	25	10	1	2	2	2
0	3	3	2	3	40	5	30	1	2	2	4
0	3	3	2	3	40	15	30	1	1	2	2
1	4	2	1	4	30	35	30	1	1	1	2
0	3	3	2	3	25	20	25	1	1	1	2
0	4	2	2	3	40	20	40	0	1	1	2
1	3	2	2	4	15	9	5	1	1	1	2
0	3	2	2	3	12	9	7	1	1	1	2
0	3	2	1	4	50	20	15	1	1	1	2
1	4	3	2	4	40	10	15	1	1	1	2
1	5	2	2	4	35	15	25	1	1	1	2
0	3	4	2	3	30	5	10	1	1	2	2
0	5	2	2	3	30	20	20	1	2	2	3
1	4	2	2	1	20	2	2	1	1	2	3
0	2	1	2	4	50	20	30	1	1	1	2
1	4	5	1	4	40	20	30	1	1	1	2
0	2	2	2	3	25	17	15	1	1	2	2
1	4	4	2	4	35	10	15	0	1	2	1
0	3	3	2	3	40	20	5	1	1	2	3
1	3	3	2	3	30	10	2	1	2	2	2
0	2	2	2	4	30	5	10	1	2	2	2
0	3	3	2	4	30	8	15	1	1	2	2
1	3	3	2	4	15	15	15	0	2	2	1
1	3	2	2	3	35	10	10	0	2	1	2
1	2	2	2	4	40	30	25	1	1	2	3
1	3	3	2	3	40	20	20	1	2	1	1
1	2	1	2	3	30	10	2	1	1	1	2
1	3	3	2	4	40	20	15	0	1	1	2
1	4	3	2	3	35	25	5	1	1	2	2
1	4	4	2	4	40	10	5	0	2	1	3
1	3	2	2	4	40	15	5	0	2	2	3
0	4	4	2	3	35	10	20	1	2	2	3
0	5	6	2	4	25	15	15	0	1	1	2
1	3	2	2	3	50	15	8	1	2	1	2
0	3	3	1	3	40	15	16	1	1	1	2
0	3	3	2	4	20	5	5	1	1	1	2
0	3	2	2	4	50	20	30	1	1	1	2
1	3	3	2	3	40	20	20	1	2	1	1
0	3	3	1	4	40	15	16	1	1	1	2
0	2	2	2	4	25	15	5	0	2	2	2
0	4	6	2	4	50	15	20	1	1	1	2
0	4	2	2	3	50	30	40	1	1	2	2
0	3	3	1	3	20	10	25	0	2	2	2
0	3	2	2	1	9	4	10	1	2	2	2
0	2	2	1	4	20	5	2	1	1	1	2
0	3	2	1	3	40	20	30	1	1	2	2
0	3	5	2	4	50	15	10	1	1	2	2
0	3	2	1	3	40	35	35	1	2	2	2
0	3	3	2	4	45	20	30	1	1	2	2
1	4	4	2	4	40	20	20	1	2	2	3
0	2	1	2	4	40	10	15	0	1	2	1
0	3	3	2	3	30	10	15	1	1	2	2
0	3	2	2	3	40	30	30	1	1	1	2
0	3	3	2	3	40	20	20	1	1	2	3
0	3	3	2	4	20	5	5	1	1	1	2
1	4	4	2	3	40	30	35	1	1	1	2
0	2	2	2	4	30	5	10	1	2	2	2
1	3	4	1	3	60	50	50	1	1	2	2
1	4	5	1	3	50	20	5	1	1	1	2
1	2	1	2	4	40	15	15	1	2	2	1
1	2	2	2	3	50	30	20	1	2	1	2
0	2	2	1	3	60	20	20	0	2	2	3
0	4	4	2	3	30	20	20	1	2	2	2
0	3	3	2	3	40	30	20	1	1	2	2
1	4	3	1	3	40	15	20	1	1	1	2
0	3	3	1	3	40	25	20	0	1	1	2
0	2	2	1	3	40	20	20	1	1	1	2
0	2	2	1	4	80	25	20	1	2	2	2
0	3	3	2	3	40	20	20	1	1	2	2
0	3	4	2	4	25	20	5	1	2	2	2
0	3	2	2	3	20	10	10	1	1	1	2
0	2	1	1	3	40	10	15	0	2	2	2
0	3	3	2	4	25	10	10	1	1	2	2
0	2	1	2	2	18	15	5	1	2	2	2
0	2	2	2	4	70	20	25	1	2	2	2
0	4	5	2	4	30	15	15	1	1	1	3
0	4	2	2	4	30	15	15	1	1	1	3
1	3	3	2	4	40	20	40	1	1	2	2
1	3	1	1	3	20	5	10	0	1	1	2
1	3	2	2	4	35	15	10	1	2	2	1
1	4	4	2	3	15	35	30	1	2	2	2
0	2	2	1	3	60	20	10	0	2	2	2
1	3	3	1	3	30	10	5	1	2	2	2
0	3	2	1	3	25	12	25	1	1	1	2
0	2	2	1	3	28	10	25	1	1	1	2
0	3	4	2	2	30	15	3	1	1	1	3
1	3	2	2	3	40	15	30	1	2	2	2
0	2	2	2	3	35	10	20	1	1	2	2
1	2	2	2	3	24	15	12	1	2	1	2
1	3	3	2	3	20	9	7	1	2	1	2
0	3	3	2	3	40	10	5	1	1	1	2
0	2	2	2	3	30	15	10	1	1	1	2
0	2	2	2	3	30	20	10	1	1	1	2
1	3	3	2	3	30	15	5	1	1	1	1
1	2	2	2	3	15	15	10	1	1	1	2
1	3	2	2	3	32	10	20	1	1	2	2
0	3	2	2	3	25	10	15	1	2	2	2
0	3	3	1	1	25	18	25	1	2	2	2
0	2	2	2	3	22	13	20	1	1	1	2
1	2	2	1	2	20	10	15	1	1	1	2
0	3	2	2	3	35	15	20	1	1	1	2
1	2	2	1	2	18	10	10	1	1	2	2
0	2	1	1	3	20	10	10	0	1	1	2
0	3	1	1	4	45	10	10	1	1	2	2
0	3	2	1	1	30	15	20	0	2	2	2
1	4	5	1	4	20	10	15	0	1	2	2
0	3	2	2	3	40	15	10	1	2	2	1
0	4	5	2	4	50	40	15	1	2	2	3
1	3	4	2	4	40	7	10	1	2	2	2
1	3	3	2	3	45	25	30	1	2	2	1
1	3	4	2	4	40	25	30	1	1	2	2
0	4	2	2	3	15	30	17	0	1	2	2
0	3	2	2	3	15	20	20	1	1	2	3
1	4	6	1	4	30	10	5	1	1	2	2
1	4	2	2	4	40	20	30
1	3	3	1	3	40	10	7	0	1	2	2
0	3	3	2	3	35	20	35	1	1	2	2
1	5	2	2	3	8	8	14
1	3	3	2	4	15	5	5	0	1	2	2
0	4	6	2	3	44	23	20	1	2	2	2
0	5	2	1	3	45	35	35	1	1	2	3
0	4	5	2	4	40	25	20	1	2	2	2
0	5	3	1	4	40	10	25	1	1	1	2
0	3	4	2	4	50	20	18	0	1	2	2
1	3	3	2	3	30	15	10	0	1	1	2
1	2	2	2	3	15	10	12
1	4	2	2	3	50	10	5	1	2	2	2
1	5	5	2	3	25	15	25	1	2	1	1
0	3	3	2	3	25	15	20	1	2	2	2
0	4	5	2	4	40	10	10	1	2	1	2
0	3	3	2	3	40	20	20	1	1	1	2
0	3	3	2	3	30	20	20	1	2	2	2
0	4	5	2	4	20	2	5	1	1	1	2
0	4	5	2	4	15	10	10	1	2	2	1
0	3	4	2	4	30	15	30
1	4	6	2	3	40	25	10	1	2	2	2
0	3	5	2	3	40	10	25	1	2	1	2
1	5	6	1	3	25	15	10
0	3	2	2	3	40	30	30	1	1	2	2
1	6	6	2	4	40	10	10	1	1	2	2
0	4	5	2	4	35	20	19	1	1	1	2
1	3	2	2	3	20	20	20
0	3	3	2	4	35	20	25	1	1	1	2
1	5	5	1	3	25	15	15
1	4	2	2	3	35	18	30	1	2	1	2
0	4	2	2	3	45	20	10
1	4	6	2	3	35	20	30
0	4	5	2	3	40	25	20	1	2	1	2
0	2	2	2	3	40	25	20	0	1	2	2
0	3	2	1	4	30	25	20	0	2	2	2
0	4	3	2	3	25	20	20	1	2	1	2
1	4	6	2	3	25	2	50	1	2	1	2
0	4	2	2	3	50	25	30
1	3	2	2	4	50	45	45	1	1	1	3
1	2	2	2	3	41	30	40	0	2	2	2
0	4	6	2	3	40	20	10
0	4	5	2	4	45	25	20	1	1	1	2
0	3	3	2	4	45	30	25	1	1	2	2
1	4	3	2	4	50	15	40	1	2	2	1
1	3	2	2	3	45	6	12	1	2	2	2
0	4	3	2	3	30	7	7	1	2	2	2
0	2	3	2	3	35	20	10	1	1	2	2
0	3	2	2	3	40	10	20	0	1	2	2
0	3	2	2	2	80	65	60	0	1	1	2
0	4	6	2	3	25	15	13	1	2	2	2
1	5	3	2	4	30	10	5
1	4	4	2	4	20	10	10	1	2	1	2
1	3	3	2	4	30	5	5	1	2	2	2
0	4	2	2	3	60	35	45	1	1	2	2
1	4	6	2	4	20	10	6	1	2	1	2
1	4	2	2	4	50	25	30	0	2	1	1
1	4	2	2	3	35	25	25	0	2	2	2
1	4	2	1	3	15	10	10
0	3	3	2	4	35	10	15	1	1	1	2
1	3	1	2	4	32	15	15	1	1	1	1
0	4	5	1	3	40	10	15	1	1	1	2
0	4	6	2	4	50	30	15	1	2	2	2
0	4	6	2	3	30	20	30	1	1	2	2
0	3	3	2	3	50	15	15	1	1	1	2
1	3	2	2	3	40	15	20	1	2	2	2
0	5	6	2	4	40	25	15	1	1	1	2
0	5	2	2	3	45	35	15	1	1	2	2
1	4	5	2	3	35	10	10	1	2	1	2
0	4	5	1	3	15	8	10	0	2	1	2
1	3	2	2	4	20	5	4	0	1	2	2
1	4	6	1	4	15	20	15	0	1	2	2
1	3	2	2	4	45	20	20	1	2	2	2
0	4	5	2	3	50	30	25	1	1	1	2
1	4	6	2	3	20	3	10	1	2	2	2
0	3	2	1	4	38	10	10
1	4	2	2	3	30	20	20	1	1	2	2
0	4	4	2	4	20	8	5	1	1	2	2
1	4	3	2	3	30	15	5
1	4	2	2	3	35	10	25	1	1	2	2
1	3	3	2	3	35	10	6
1	4	2	2	4	10	15	10	0	2	2	2
1	5	3	1	3	45	15	15	1	2	2	2
0	3	3	2	3	30	15	15	1	1	2	2
0	5	6	2	3	30	18	25	0	1	2	2
0	4	6	2	3	35	10	20	1	1	1	2
0	6	2	2	4	45	20	20	1	2	2	2
1	3	3	2	4	25	10	15	1	1	2	2
1	5	6	2	4	50	20	15
0	3	3	2	4	40	15	18
1	2	2	2	3	45	20	25	1	2	2	2
1	5	2	2	3	35	20	30
0	4	2	2	3	20	10	15	0	1	2	2
0	3	3	2	4	35	20	15	1	2	2	2
1	5	2	1	3	50	10	15
1	3	3	2	4	50	20	10	1	2	2	2
1	3	2	1	4	50	15	15	1	1	2	2
0	3	2	1	4	20	20	20	0	1	2	2
1	2	2	1	4	50	40	10
0	3	2	1	1	40	10	25	0	1	2	2
0	2	1	1	3	30	15	10	1	1	2	2
1	1	1	1	1	65	25	50	1	2	2	2

## Sheet: Recom.for >65 years
Gender	tetanus for healty adult≥65®	hepatit A for healty adult≥65 ®	HBV for healty adult≥65 ®	pneumococcal for healty adult≥65 ®	ınfluenza for healty adult≥65 ®	Meningococcal for healty adult≥65®	H.influeza for healty adult≥65
0	0	0	0	1	1	0	0
1
1	1	1	1	0	0	0	0
1
1	1	0	1	1	1	1	1
1	0	0	0	1	1	0	0
0	1	0	1	1	1	0	0
0	1	0	1	1	1	0	0
1	1	0	1	0	1	0	0
0	1	0	1	0	1	0	0
0	0	0	0	0	1	0	0
1	1	0	0	0	0	0	0
0	1	0	1	1	1	0	0
0	1	0	0	1	1	0	0
1	1	0	1	0	1	0	0
1	1	0	1	1	1	0	0
0	1	0	1	1	1	0	0
0
1
0	1	0	1	0	1	0	0
1	1	0	1	1	1	0	0
0	1	1	1	0	1	1	0
1	1	0	1	1	1	1	1
0	1	1	1	0	1	1	1
1	1	1	0	0	0	0	0
0	1	0	1	1	1	1	1
0	1	0	1	1	0	1	1
1	0	0	1	0	0	0	0
1	0	0	0	1	1	1	1
1	1	1	1	0	1	0	1
1	1	1	1	1	1	1	1
1	1	0	1	1	1	1	1
1	1	0	1	0	0	0	0
1	0	0	1	0	0	0	0
1	1	1	1	1	1	0	1
1	0	0	1	0	0	0	0
0	1	0	1	1	1	1	1
0	1	0	1	1	1	1	1
1
0	1	1	1	1	1	1	1
0	0	0	0	0	0	0	0
0	1	0	1	1	1	1	0
1	1	0	1	1	1	1	0
0	1	1	1	1	1	1	1
0
0	1	0	0	1	1	0	0
0	1	1	1	1	1	1	0
0	0	0	0	0	0	0	1
0
0	1	1	1	1	1	1	1
0	1	1	1	0	0	0	0
0	1	1	1	0	0	0	0
0	1	0	1	1	1	1	1
0	1	0	1	0	0	0	0
1	0	0	0	1	0	0	0
0	1	0	1	1	1	1	1
0	1	0	1	1	0	1	1
0	1	0	1	1	1	0	1
0	1	1	1	0	1	1	0
0	0	0	0	1	1	0	0
1	0	0	1	1	1	0	0
0	1	0	1	1	1	1	1
1	0	1	1	1	1	0	0
1
1	1	1	1	0	1	1	1
1	0	0	1	1	0	0	0
0	1	0	1	1	1	0	1
0	0	0	0	0	1	0	0
0	0	0	0	1	1	0	0
1
0	1	0	1	1	1	0	0
0	1	1	1	1	1	1	0
0	1	0	1	0	1	0	0
0	1	0	1	1	1	0	0
0	1	0	1	1	1	1	1
0	1	1	1	0	1	1	1
0	1	1	1	1	0	1	1
0	1	0	0	1	1	0	0
0	0	0	0	0	1	1	0
0	1	1	1	1	1	1	1
0	1	0	1	1	1	1	0
0
1	0	0	1	1	0	1	1
1	1	0	1	1	0	0	0
1	1	0	1	0	0	0	1
1	1	0	0	0	1	0	0
0	1	0	0	0	1	0	0
1	0	0	0	1	1	1	1
0	1	1	1	1	1	0	0
0	1	1	1	1	1	0	0
0	1	1	1	0	1	0	0
1	1	0	1	1	1	0	0
0	1	1	1	1	1	0	0
1	0	0	0	0	0	0	0
1	1	1	1	0	1	1	0
0	1	1	1	0	1	0	0
0	1	1	1	1	1	0	0
0	1	1	1	1	1	0	0
1	1	1	1	1	1	0	0
1	1	1	0	1	1	0	0
1	1	1	1	1	1	0	0
0	1	1	1	1	1	0	0
0	1	1	1	0	1	0	0
0	1	1	1	1	1	0	0
1	1	1	1	1	1	0	0
0	1	1	1	1	1	0	0
1
0	1	1	1	0	1	0	0
0
0	1	0	0	1	1	0	0
1
0	0	0	0	1	1	0	0
0	0	0	0	0	0	0	1
1	1	1	1	1	1	1	0
1	1	0	1	1	1	1	1
1	1	1	1	1	1	1	1
0	1	1	1	1	0	1	0
0	1	1	1	1	1	1	1
1	0	0	0	1	1	0	0
1
1	1	0	0	1	1	0	0
0	0	0	1	0	1	0	1
1
1
0	1	0	0	0	0	0	1
0	0	0	0	1	1	0	0
0	1	0	0	1	1	1	1
0	1	0	0	1	1	0	0
0	1	0	0	1	1	0	0
1	1	1	1	1	1	1	0
1
1	1	1	1	1	1	1	1
1
0	0	0	1	0	0	0	1
0	1	0	1	1	1	0	0
0	0	0	0	0	1	0	0
0	0	0	0	1	1	1	0
0	1	0	1	1	1	1	0
0
0
1	0	0	1	1	0	0	0
0
1
0
1	0	0	0	0	0	0	0
0	0	0	0	1	1	1	1
1
0
1
1	1	0	0	1	1	0	0
0
1
0	1	0	1	1	1	0	0
0	1	1	1	1	1	1	0
0	0	0	0	1	1	0	0
0	1	0	0	1	1	0	0
1
0
1	1	1	1	1	1	1	1
1	1	1	1	1	1	1	1
0
0	1	0	0	1	1	1	0
0	1		1	1	1	1	1
1	1	0	0	1	1	0	0
1
0	1	0	1	1	1	0	1
0	1	0	1	0	0	0	0
0	1	0	0	0	1	0	0
0	1	0	1	1	1	0	0
0	0	0	1	1	1	0	0
1
1	0	0	0	1	1	1	1
1	0	0	1	0	0	0	0
0	1	0	1	1	1	0	0
1	1	0	1	0	1	0	0
1	0	0	0	1	1	0	0
1	0	0	1	0	0	0	1
1
0	1	0	1	0	1	0	0
1	1	1	1	1	1	1	1
0	1	0	0	1	1	1	1
0
0	1	1	1	1	1	1	0
0	0	0	0	1	1	0	0
1	0	0	1	1	0	0	0
0	1	1	1	1	1	1	0
0	1	0	1	1	1	1	0
1	1	1	1	1	1	1	1
0	0	0	0	1	1	0	0
1	1	1	1	1	1	1	0
1	1	0	1	1	1	0	0
1	1	0	1	1	1	0	0
0	1	1	1	1	1	1	0
1	0	1	1	1	1	0	0
0
1	1	0	0	1	0	0	1
0	1	0	1	1	1	0	1
1
1	0	0	0	0	1	0	1
1
1	1	1	1	0	1	1	1
1	1	1	1	1	1	1	1
0	0	0	0	0	1	0	0
0	0	0	1	1	1	1	0
0	0	0	0	1	1	0	0
0	1	0	1	1	1	0	1
1	1	0	0	1	0	1	0
1
0
1	1	1	1	1	1	1	1
1
0	0	0	1	1	1	1	0
0	0	0	0	0	1	0	0
1
1	1	0	1	1	1	1	0
1	1	0	1	1	1	1	1
0	1	1	1	1	1	1	1
1
0	1	1	1	0	1	0	0
0	0	0	0	0	0	0	1
1	1	1	1	0	0	0	0

## Sheet: Recom for DM
Gender	tetanus for DM ®	Pneumococcal for DM®	Influenza for DM ®	Meningococcal for DM®	hepatitis A for DM ®	Hepatitis B for DM ®	H.influenza for DM ®
0	0	1	1	0	0	0	0
1
1	0	1	1	0	0	0	0
1
1	1	1	1	1	0	1	0
1	1	1	1	1	0	0	0
0	1	1	1	0	0	1	1
0	1	1	1	0	0	1	1
1	0	1	1	0	0	1	0
0	0	1	1	0	0	1	0
0	1	1	1	0	0	1	0
1	0	1	1	0	0	0	0
0	0	1	1	0	0	0	0
0	1	0	1	0	0	1	0
1	0	1	1	0	0	1	0
1	0	1	1	0	0	1	0
0	1	1	1	1	0	0	0
0
1
0	0	1	1	0	0	1	0		r
1	0	1	1	0	0	0	0
0	1	1	1	0	0	1	0
1	1	1	1	1	1	1	1
0	1	0	0	0	0	1	0
1
0
0	1	1	1	1	1	1	1
1	0	0	0	0	0	1	0
1	0	1	1	0	0	1	1
1	1	0	1	0	1	1	1
1	1	1	0	0	0	1	1
1	1	1	1	1	0	0	1
1	1	1	1	0	0	1	1
1	0	1	1	0	0	0	0
1	1	1	1	1	0	1	1
1	0	1	0	0	0	0	0
0	1	1	1	1	1	1	1
0	1	1	1	0	0	1	0
1	0	1	1	1	0	1	1
0	1	1	1	1	1	1	1
0	0	1	1	1	0	1	1
0	1	1	1	0	0	0	1
1	0	1	1	0	0	0	0
0	1	1	1	1	1	1	1
0
0	1	1	1	0	0	0	0
0	1	1	1	0	0	0	0
0
0
0	1	1	1	1	0	1	1
0	0	1	1	0	0	0	0
0	0	1	1	0	0	0	0
0	1	1	1	1	1	1	1
0	0	1	1	0	0	0	0
1	0	1	1	0	0	0	0
0	1	1	1	1	1	1	1
0	1	1	1	1	1	1	1
0	0	1	1	0	0	1	1
0	1	0	0	0	0	1	0
0	0	1	0	0	0	0	0
1	0	1	0	0	0	0	0
0	0	1	1	0	0	0	0
1	0	1	1	0	0	0	0
1
1	1	1	1	1	0	0	1
1	0	1	1	0	0	0	0
0	0	1	1	0	1	1	0
0	0	1	0	0	0	0	0
0	0	1	1	0	0	0	0
1	0	1	1	0	0	1	0
0	0	1	1	0	0	0	0
0	0	1	1	0	0	0	0
0	0	1	1	0	0	1	1
0	0	1	1	0	0	0	0
0	0	1	1	0	0	0	0
0	1	1	1	1	1	1	1
0	1	1	1	1	1	1	1
0	1	1	0	0	0	0	0
0	0	0	1	0	0	0	0
0	0	0	0	0	0	0	1
0	0	1	1	1	0	0	0
0
1	0	1	1	0	0	1	1
1	0	1	1	0	0	0	0
1	0	0	0	0	0	1	1
1	0	1	1	0	0	0	0
0	0	1	1	0	0	0	0
1	0	1	1	0	0	0	1
0	1	1	1	0	1	1	0
0	1	1	1	0	1	1	0
0	0	1	0	0	0	0	1
1	0	1	1	0	0	1	0
0	1	1	1	0	0	1	0
1	1	0	1	0	1	1	1
1	1	1	1	0	0	1	0
0	1	1	1	0	0	1	0
0	1	1	1	0	0	1	0
0	1	1	1	0	0	1	0
1	1	1	1	0	0	1	0
1	1	1	1	0	0	1	0
1	1	1	1	0	0	1	0
0	1	1	1	0	1	1	0
0	0	1	0	0	0	0	1
0	1	1	1	0	0	1	0
1	1	1	1	0	0	1	0
0	1	1	1	0	0	1	0
1
0	1	0	0	0	0	0	0
0
0
1
0	0	1	1	0	0	0	0
0	1	1	1	0	1	1	1
1	0	1	1	0	0	0	0
1	1	1	1	1	0	0	0
1	1	1	1	1	0	1	1
0	1	1	1	0	0	1	1
0	0	1	1	0	0	0	0
1
1
1	0	1	1	0	0	0	0
0	1	0	0	0	0	0	0
1
1	1	1	1	1	1	1	1
0	0	1	1	0	0	0	0
0	1	1	1	0	0	0	1
0	0	1	1	1	0	0	1
0	0	1	1	0	0	0	0
0	0	1	1	0	0	0	0
1	1	1	1	0	0	1	0
1
1	0	0	1	0	0	0	0
1	0	1	1	0	0	0	0
0	0	1	1	0	0	0	1
0	1	1	1	0	0	1	0
0	1	1	1	0	1	0	0
0	0	1	0	1	0	1	0
0	0	1	1	0	0	0	1
0	0	0	1	0	0	0	0
0
1	0	0	1	0	0	0	0
0
1
0
1	0	0	0	0	0	0	1
0	0	1	1	1	0	1	1
1
0
1
1	0	1	1	0	0	0	0
0
1
0	0	1	1	0	0	0	1
0	1	1	0	0	0	0	0
0	0	1	1	0	0	0	0
0	0	1	1	0	0	0	0
1	1	1	1	1	1	1	1
0
1	1	1	1	1	1	1	1
1	1	1	1	1	1	1	1
0
0	1	1	1	1	0	0	0
0	1	1	1	1	1	1	1
1	1	1	1	1	1	1	1
1
0	0	0	1	0	0	0	0
0	1	0	0	0	0	1	0
0	0	1	1	1	0	0	0
0	0	1	1	1	0	1	0
0	0	1	1	1	1	1	0
1
1	1	0	1	1	1	1	1
1
0	1	1	1	0	1	1	1
1	0	1	1	0	0	0	0
1	0	1	1	0	0	0	0
1	0	1	1	0	0	0	0
1
0	1	1	1	1	0	1	0
1	1	1	1	1	1	1	1
0	1	1	1	0	0	0	0
0
0	0	1	1	1	1	1	0
0	0	1	1	0	0	0	0
1	0	1	0	0	0	0	0
0	1	1	1	0	0	0	0
0	0	1	1	0	0	0	0
1	1	1	1	1	1	1	1
0	0	1	1	0	0	0	0
1	1	1	1	0	0	0	0
1	0	1	1	0	0	1	1
1	0	0	1	0	0	1	0
0	1	1	1	1	0	1	0
1	0	1	1	0	1	1	0
0
1	1	1	0	0	0	0	1
0	0	1	1	0	0	0	1
1
1	1	1	1	1	0	0	1
1
1	0	1	1	1	0	0	1
1	0	0	1	0	0	0	0
0	0	1	1	0	0	0	0
0	0	1	1	0	0	0	0
0	1	0	1	0	0	0	0
0	0	1	1	1	0	1	1
1	0	0	0	0	0	1	0
1
0
1	1	1	1	1	1	1	1
1
0	1	1	1	1	1	1	0
0	0	1	1	0	0	0	0
1
1	0	1	1	0	0	0	0
1	1	1	1	1	1	1	1
0	0	1	1	1	1	1	1
1
0	0	1	1	0	0	0	0
0
1	1	0	0	0	0	0	0

## Sheet: Recom for COPD
Gender	tetanus forCOPD ®	Pneumococcal for COPD®	Influenza for COPD ®	Meningococcal for COPD®	hepatitis A for COPD ®	Hepatitis B forCOPD ®	H.influenza for COPD ®
0	0	1	1	0	0	0	0
1
1	0	1	1	0	0	0	0
1
1	1	1	1	1	0	1	0
1	0	1	1	0	0	0	0
0
0	1	1	0	0	0	0	0
1	0	1	1	0	0	1	0
0	0	1	1	0	0	1	0
0	1	1	1	1	0	1	0
1	0	1	1	0	0	0	0
0	0	1	1	0	0	0	0
0	0	0	1	0	0	0	0
1	0	1	1	0	0	1	0
1	0	1	1	0	0	1	0
0	0	1	1	0	0	0	0
0
1
0	0	1	1	0	0	1	0
1	0	1	1	0	0	0	0
0	1	1	1	0	0	1	0
1	1	1	1	1	1	1	1
0	0	1	1	0	0	0	1
1
0	0	1	1	0	0	0	1
0	0	1	1	0	0	0	1
1	0	0	0	0	0	1	0
1	0	1	1	0	0	0	1
1	1	0	1	0	1	1	1
1	1	1	1	0	0	1	1
1	0	1	1	0	0	0	1
1	0	0	1	1	0	1	0
1	0	1	1	0	0	0	0
1	0	1	1	0	0	0	1
1	0	1	1	0	0	0	1
0	1	1	1	1	1	1	1
0	0	1	1	0	0	1	1
1	0	1	1	0	0	0	1
0	1	1	1	1	1	1	1
0	0	0	1	1	0	1	1
0	0	1	1	0	0	0	1
1	0	1	1	0	0	0	0
0	1	1	1	1	1	1	1
0
0	1	1	1	0	0	0	0
0	1	1	1	0	0	0	0
0	0	0	1	0	0	0	0
0
0	0	1	1	1	0	0	1
0	0	1	1	0	0	0	0
0	0	1	1	0	0	0	0
0	1	1	1	1	1	1	1
0	0	1	1	0	0	0	0
1	0	1	1	0	0	0	0
0	1	1	1	1	1	1	1
0	0	1	1	0	0	0	0
0	0	1	1	0	0	0	1
0	0	1	1	0	0	0	1
0	0	1	0	0	0	0	1
1	0	1	0	0	0	0	0
0	0	1	1	0	0	0	0
1	0	1	1	0	0	0	0
1
1	0	1	1	1	0	0	1
1	0	1	1	0	0	0	0
0
0	0	1	1	0	0	0	0
0	0	1	1	0	0	0	0
1	0	1	1	0	0	1	0
0	0	1	1	0	0	0	0
0	0	1	1	0	0	0	0
0	0	1	0	0	0	1	1
0	0	1	1	0	0	0	0
0	0	1	1	0	0	0	0
0	0	1	1	1	0	0	0
0	0	1	0	1	0	0	1
0	0	1	0	0	0	0	0
0	0	0	1	0	0	0	0
0	0	1	0	0	0	0	0
0	0	1	1	1	0	0	1
0
1	0	1	1	0	0	1	1
1	0	1	1	0	0	0	0
1
1	0	1	1	0	0	0	1
0	0	1	1	0	0	0	1
1
0	1	1	1	0	1	1	0
0	1	1	1	0	1	1	0
0	0	1	0	0	0	0	1
1	1	1	1	1	0	0	1
0	1	1	1	0	0	1	0
1	1	0	1	0	0	1	1
1	1	1	1	0	0	1	0
0	1	1	1	0	0	1	0
0	1	1	1	0	0	1	0
0	1	1	1	0	0	1	0
1	1	1	1	0	0	1	0
1	1	1	1	0	0	1	0
1	1	1	1	0	0	1	0
0	1	1	1	0	0	1	0
0	0	1	1	0	0	0	1
0	1	1	1	0	0	1	0
1	1	1	1	0	0	1	0
0	1	1	1	0	0	1	0
1
0	0	1	1	0	1	1	1
0
0	0	1	1	0	0	0	0
1
0	0	1	1	0	0	0	0
0	0	1	1	0	0	1	1
1	0	1	1	0	0	1	0
1	1	1	1	1	0	0	0
1	1	1	1	1	0	1	1
0	1	1	1	0	0	1	1
0	0	1	1	0	0	0	0
1	0	1	0	0	0	0	0
1
1	0	1	1	0	0	0	0
0	0	1	1	0	0	0	1
1
1	1	1	1	1	1	1	1
0	0	1	1	0	0	0	0
0	0	1	1	0	0	0	1
0	0	1	1	1	0	0	1
0	0	1	1	0	0	0	0
0	0	1	1	0	0	0	0
1	1	1	1	0	0	1	0
1
1	0	1	1	0	0	0	0
1	0	1	0	0	0	0	0
0	0	1	1	0	0	0	1
0	0	1	1	0	0	0	0
0	0	1	1	0	0	0	1
0	0	1	0	1	0	1	0
0	0	1	1	0	0	0	0
0	0	1	1	0	0	0	0
0
1	0	0	1	0	0	1	0
0
1
0
1	0	0	0	0	0	0	1
0	0	1	1	1	0	1	1
1
0
1
1	0	1	1	0	0	0	0
0
1
0	0	1	1	0	0	0	1
0
0	0	1	1	0	0	0	0
0	0	1	1	0	0	0	0
1	0	1	1	0	0	0	1
0
1	1	1	1	1	0	1	0
1	1	1	1	1	1	1	1
0
0	1	1	1	0	0	0	0
0	1	1	1	1	1	1	1
1	1	1	1	1	1	1	1
1
0	0	0	1	0	0	0	0
0	1	0	0	0	1	1	0
0	0	1	1	1	0	0	0
0	0	1	1	1	0	1	0
0	0	1	1	1	0	0	0
1
1	1	1	1	1	1	1	1
1	0	1	0	1	0	0	0
0	1	1	1	0	1	1	1
1	0	1	1	0	0	0	0
1	0	1	1	0	0	0	0
1	0	1	1	0	0	0	0
1
0	1	0	1	0	1	1	0
1	1	1	1	1	1	1	1
0	1	1	1	0	0	0	0
0
0	0	1	1	1	1	1	0
0	0	1	1	0	0	0	0
1	0	1	0	0	0	1	0
0	0	1	1	0	0	0	0
0	0	1	1	0	0	0	0
1	1	1	1	1	1	1	1
0	0	1	1	0	0	0	0
1	1	1	1	0	0	0	0
1	0	1	1	0	0	0	1
1	0	1	1	0	0	1	0
0	1	1	1	1	0	0	0
1	0	1	1	0	1	0	0
0
1	1	0	0	0	0	0	1
0	0	1	1	0	0	0	1
1
1	1	0	0	0	0	0	1
1
1	0	1	1	1	1	1	1
1	0	1	1	0	0	0	0
0	0	1	0	0	0	0	1
0	0	1	0	0	0	0	0
0	0	1	1	0	0	0	0
0	0	1	1	1	0	1	1
1	0	1	1	1	0	1	0
1
0
1	0	0	1	1	1	1	1
1
0	1	1	1	1	1	1	0
0	0	1	1	0	0	0	1
1
1	0	1	1	0	0	0	0
1	1	1	1	1	1	1	1
0	0	1	1	1	0	0	0
1
0	0	1	1	0	0	0	0
0
1	1	0	0	0	0	0	0

## Sheet: Recom for CRF
Gender	tetanus for CRF ®	Pneumococcal for CRF®	Influenza for CRF ®	Meningococcal for CRF®	hepatitis A for CRF®	Hepatitis B for CRF ®	H.influenza forCRF ®
0	0	1	1	0	0	0	0
1
1	0	1	1	0	0	0	0
1
1	1	1	1	1	0	1	0
1	1	1	1	1	0	0	1
0	1	1	1	1	0	1	1
0	1	1	1	1	0	1	1
1	0	1	1	0	0	1	0
0	0	1	1	0	0	1	0
0	1	1	1	1	0	1	0
1	0	0	1	0	0	0	0
0	0	0	1	0	0	0	0
0
1	0	0	1	0	0	1	0
1	0	0	1	0	0	1	0
0	0	1	1	0	0	0	0
0
1
0	0	0	1	0	0	1	0
1	0	0	1	0	0	0	0
0	1	1	1	0	0	1	0
1	1	1	1	1	1	1	1
0	1	0	0	0	0	1	0
1	0	0	0	0	1	0	0
0
0	1	0	0	0	0	1	1
1	0	0	0	0	0	1	0
1	1	0	0	0	0	1	0
1	1	0	1	0	1	0	0
1	1	1	1	1	0	1	1
1	0	0	0	0	0	1	0
1
1	0	1	1	0	0	0	0
1	0	0	0	0	0	1	0
1	0	1	1	1	0	1	1
0	1	1	1	1	1	1	1
0	1	1	0	0	0	1	1
1	0	0	0	0	0	1	0
0	1	1	1	1	1	1	1
0	0	0	0	0	0	1	0
0	0	0	0	0	0	1	0
1	0	1	1	0	0	1	0
0	1	1	1	1	1	1	1
0
0	1	1	1	0	0	0	0
0	1	1	1	0	0	0	0
0	0	0	0	0	0	1	1
0
0	1	0	1	0	1	1	0
0	0	1	1	0	0	0	0
0	0	1	1	0	0	0	0
0	1	1	1	1	1	1	1
0	1	1	1	0	0	0	0
1	0	1	1	0	0	1	0
0	1	1	1	1	1	1	1
0	1	0	0	0	0	1	1
0	0	1	1	0	0	0	1
0	1	0	0	0	0	0	0
0	0	0	0	0	0	1	0
1	0	1	0	0	0	1	0
0	0	1	1	0	0	0	0
1	0	1	1	0	0	1	0
1
1	1	1	1	1	0	0	1
1	0	1	1	0	0	0	0
0
0	0	1	1	0	0	0	0
0	0	1	1	0	0	0	0
1	0	1	1	0	0	1	0
0	0	1	1	0	0	1	0
0	0	0	1	0	0	0	0
0	0	1	0	0	0	1	1
0
0	0	1	1	1	0	1	0
0	0	1	1	1	1	1	0
0	1	1	1	1	1	1	1
0	0	1	0	0	1	1	0
0	0	0	1	0	0	0	0
0	0	1	0	0	0	0	0
0	0	1	1	1	0	1	1
0
1	0	1	1	0	0	1	1
1	0	1	1	0	0	0	0
1	0	1	0	0	0	0	1
1	0	0	0	0	0	1	0
0
1	1	1	1	0	1	0	0
0	1	1	1	0	1	1	0
0	1	1	1	0	1	1	0
0	0	0	1	0	0	0	0
1	1	1	1	0	0	1	0
0	1	1	1	0	0	1	0
1	1	0	0	0	1	0	1
1	1	1	1	0	0	1	0
0	1	1	1	0	0	1	0
0	1	1	1	0	0	1	0
0	1	1	1	0	0	1	0
1	1	1	1	0	0	1	0
1	1	1	1	0	0	1	0
1	1	1	1	0	0	1	0
0	1	1	1	0	0	1	0
0	0	0	1	0	0	0	0
0	1	1	1	0	0	1	0
1	1	1	1	0	0	1	0
0	1	1	1	0	0	1	0
1
0	1	0	0	0	1	1	0
0
0
1
0	0	1	1	0	0	0	0
0	1	1	1	0	1	1	1
1	0	1	1	0	0	1	0
1	1	1	1	1	0	1	0
1	1	1	1	1	0	1	1
0	1	1	1	0	0	1	1
0	0	0	1	0	0	1	0
1
1
1	0	1	1	0	0	0	0
0	0	1	0	0	0	0	0
1
1	1	1	1	1	1	1	1
0	0	0	1	0	0	0	0
0	1	1	1	1	1	1	1
0	0	1	1	1	0	0	1
0	0	0	1	0	0	1	0
0
1	1	1	1	0	0	1	0
1
1	0	1	1	0	0	0	0
1
0	0	1	1	0	0	1	1
0	0	1	1	0	0	1	0
0	1	1	1	0	1	1	0
0	0	1	0	1	0	1	0
0	0	1	1	0	0	1	0
0	0	0	1	0	0	0	0
0
1	0	0	1	0	0	1	0
0
1
0
1	0	0	0	0	0	1	0
0	0	1	1	1	0	1	1
1
0
1
1	0	1	1	0	0	0	0
0
1
0	0	1	1	0	0	1	1
0
0	1	1	1	0	1	1	0
0	0	1	1	0	0	0	0
1	1	1	1	1	1	0	0
0
1	0	1	1	1	0	1	0
1	1	1	1	1	1	1	1
0
0	1	1	1	1	0	0	0
0	1	1	1	1	1	1	1
1	1	1	1	1	0	1	1
1
0	0	0	1	0	0	0	0
0	1	0	0	1	1	1	0
0
0	0	1	1	1	0	1	0
0	0	1	1	0	1	1	0
1
1	1	1	1	1	1	1	1
1
0	1	1	1	0	1	1	1
1	0	1	1	0	0	0	0
1	0	1	1	0	0	1	0
1	0	1	1	0	0	0	0
1
0	1	0	1	0	1	1	0
1	1	1	1	1	1	1	1
0	1	1	1	0	0	0	0
0
0	0	1	1	1	1	1	0
0	0	0	0	0	0	1	0
1	0	1	0	0	0	0	0
0	0	1	1	0	0	0	0
0	0	1	1	0	0	1	0
1	1	1	1	1	1	1	1
0	0	1	1	0	0	1	0
1	1	1	1	1	0	0	0
1	0	1	1	0	0	1	1
1	0	1	1	0	0	1	0
0	1	1	1	1	0	1	0
1	0	1	1	0	1	1	0
0
1	1	0	0	1	1	1	1
0	0	1	1	0	0	0	1
1
1	1	1	1	1	0	0	0
1
1	0	1	1	1	1	1	1
1	0	0	1	0	0	0	0
0	0	0	1	1	0	0	1
0	0	1	0	0	0	0	0
0	0	0	0	0	1	1	0
0	0	0	1	0	0	0	1
1	0	1	1	1	0	1	0
1
0
1	0	1	1	1	0	0	0
1
0	1	1	1	1	1	1	0
0	0	1	1	0	0	1	1
1
1	0	1	1	0	0	0	0
1	1	1	1	1	1	1	1
0	0	0	1	0	1	0	0
1
0	0	1	1	0	0	0	0
0
1	1	0	0	0	0	0	0

## Sheet: Recom for CLD
Gender	tetanus for CLD ®	Pneumococcal for CLD®	Influenza for CLD ®	Meningococcal for CLD®	hepatitis A for CLD ®	Hepatitis B for CLD ®	H.influenza for CLD ®
0	0	1	1	0	0	0	0
1
1	0	1	1	0	0	0	0
1
1	1	1	1	1	0	0	0
1	0	1	1	1	1	1	1
0	1	1	1	1	0	1	1
0	1	1	1	0	0	1	1
1	0	0	1	0	0	1	0
0	0	0	1	0	0	1	0
0	1	1	1	1	1	1	0
1	0	1	1	0	0	1	0
0	0	0	1	0	0	1	0
0	0	0	1	0	0	0	0
1	0	0	1	0	0	1	0
1	0	0	1	0	0	1	0
0	0	0	1	0	0	0	0
0
1
0	0	0	1	0	0	1	0
1	0	0	1	0	0	0	0
0	1	1	1	0	0	1	0
1
0	0	1	1	0	0	1	0
1
0	0	0	0	0	1	1	0
0	0	0	0	0	1	1	0
1	0	0	0	1	0	0	0
1	1	1	1	1	1	1	1
1	1	0	1	0	1	1	1
1	1	1	0	0	1	1	1
1	0	0	0	0	0	1	0
1	1	0	0	0	0	0	0
1	0	1	1	0	0	0	0
1	1	0	0	0	0	1	0
1	0	0	0	0	1	1	0
0	1	1	1	1	1	1	0
0	1	1	1	0	1	1	0
1	1	0	0	0	1	1	0
0	1	1	1	1	1	1	1
0	0	0	0	0	1	1	0
0	0	0	0	0	0	1	0
1	0	1	1	0	0	0	0
0	1	1	1	1	1	1	1
0
0	1	1	1	1	1	1	0
0	1	1	1	0	1	1	0
0
0
0	1	0	0	0	1	1	0
0	0	1	1	0	0	0	0
0	0	1	1	0	0	0	0
0	1	1	1	1	1	1	1
0	0	1	1	0	0	0	0
1	0	1	1	0	1	1	0
0
0	0	0	0	0	1	1	0
0	0	1	1	0	0	0	1
0	0	1	1	0	0	1	0
0	0	0	0	0	1	1	0
1	0	1	0	0	1	1	0
0	0	1	1	0	1	1	0
1	0	1	1	0	1	1	0
1
1	1	1	1	1	1	1	1
1	0	1	1	0	1	1	0
0
0	0	1	1	0	0	0	0
0	0	1	1	0	0	0	0
1	0	1	1	0	0	1	0
0	0	1	1	0	0	1	0
0	0	0	0	0	1	1	0
0	0	1	0	0	0	1	1
0	0	0	0	0	0	1	0
0	0	1	1	0	0	0	0
0	0	1	1	1	1	1	0
0	0	0	0	0	1	1	0
0	0	1	0	1	1	1	0
0	0	0	1	0	1	1	0
0	1	1	0	0	0	0	0
0	0	1	0	1	0	1	0
0
1	0	1	1	0	0	1	1
1	0	1	1	0	0	0	0
1
1	0	1	1	0	0	1	0
0	0	1	1	0	0	1	1
1	0	0	0	0	1	1	1
0	1	1	1	0	1	1	0
0	1	1	1	0	1	1	0
0	0	1	0	1	1	1	1
1	1	1	0	1	0	1	1
0	1	1	1	0	0	1	0
1	1	0	0	0	1	1	0
1	1	1	1	0	0	1	0
0	1	1	1	0	0	1	0
0	1	1	1	0	0	1	0
0	1	1	1	0	0	1	0
1	1	1	1	0	0	1	0
1	1	1	1	0	0	1	0
1	1	1	1	0	0	1	0
0	1	1	1	0	0	1	0
0	0	1	1	1	1	1	1
0	1	1	1	0	0	1	0
1	1	1	1	0	0	1	0
0	1	1	1	0	0	1	0
1
0	0	1	0	0	0	0	0
0
0
1
0	0	1	1	0	0	0	0
0	0	1	1	1	0	0	1
1	0	1	1	0	0	1	0
1	1	1	1	1	0	1	0
1	1	1	1	1	1	1	1
0	1	1	1	0	0	1	1
0	0	0	0	0	1	1	0
1	0	1	0	0	0	0	0
1
1	0	1	1	0	0	0	0
0	0	1	0	1	1	1	0
1
1	1	1	1	1	1	1	1
0	0	0	0	0	1	1	0
0	1	1	1	1	0	0	1
0
0	0	1	1	1	0	0	0
0
1	1	1	1	0	0	1	0
1
1	0	0	1	0	0	0	0
1	0	1	0	0	0	0	0
0	0	1	1	0	0	0	1
0	0	0	0	0	1	1	0
0	1	0	0	0	1	1	0
0	0	1	0	1	0	1	0
0	0	1	1	0	0	0	0
0	0	0	1	0	0	0	0
0
1	0	0	1	0	0	0	0
0
1
0
1
0	0	1	1	1	1	1	1
1
0
1
1	0	1	1	0	0	0	0
0
1
0	0	1	1	0	0	1	1
0	0	1	0	0	1	1	1
0	0	1	1	0	1	1	0
0	0	1	1	0	0	0	0
1	0	1	0	0	1	1	1
0
1	0	1	1	1	1	1	0
1	1	1	1	1	1	1	1
0
0	1	1	1	1	1	1	0
0	1	1	1	1	1	1	1
1	1	1	1	1	0	0	1
1
0	0	0	1	0	1	1	0
0	1	1	0	1	0	1	0
0
0	0	1	1	0	0	1	0
0	0	0	1	0	1	1	0
1
1	1	1	1	1	1	1	1
1	0	1	0	1	1	1	0
0	1	1	1	0	1	1	1
1	0	1	1	0	1	1	0
1	0	1	1	0	0	0	0
1	0	1	1	0	0	0	0
1
0	1	0	1	0	0	1	0
1	1	1	1	1	1	1	1
0	1	1	1	0	0	0	0
0
0	0	1	1	1	1	1	0
0	0	1	1	0	0	0	0
1	0	1	0	0	0	0	0
0	0	0	0	0	1	1	0
0	0	1	1	0	0	0	0
1	1	1	1	1	1	1	1
0	0	1	1	0	0	0	0
1	1	1	1	0	0	0	0
1	0	1	0	0	1	1	0
1	0	1	1	0	0	1	0
0	1	0	1	0	1	1	0
1	0	1	1	0	1	1	0
0
1	1	0	0	0	1	1	1
0	0	1	1	0	0	1	1
1
1	1	1	1	1	0	0	0
1
1	0	1	1	1	1	1	1
1	0	0	0	0	1	1	0
0	0	0	0	0	1	1	0
0	0	1	0	0	0	1	0
0
0	0	0	1	0	1	1	1
1	0	1	1	1	0	1	0
1
0
1	1	1	1	1	0	0	0
1
0	0	0	0	0	1	1	0
0	0	1	1	0	0	0	0
1
1	0	1	0	0	0	0	0
1	1	1	1	1	1	1	1
0	0	0	1	0	1	0	0
1
0	0	1	1	0	1	1	0
0
1	1	0	0	0	0	0	0

## Sheet: Recom for splenectomy
Gender	tetanus for splenectomy ®	Pneumococcal for splenectomy®	Influenza for splenectomy ®	Meningococcal for splenectomy®	hepatitis A for splenectomy ®	Hepatitis B for splenectomy ®	H.influenza for splenectomy ®
0	1	1	1	1	0	0	0
1
1	0	0	1	0	0	0	0
1
1	1	1	1	1	0	1	0
1	0	1	0	1	0	0	1
0	1	1	1	1	0	1	1
0	1	1	1	1	0	1	1
1	0	0	1	0	0	1	0
0	0	0	1	0	0	1	0
0	1	1	1	1	0	1	0
1	0	0	1	0	0	1	0
0	0	0	1	0	0	1	0
0	0	0	1	0	0	0	0
1	0	0	1	0	0	1	0
1	0	0	1	0	0	1	0
0	0	1	1	1	0	0	1
0
1
0	0	0	1	0	0	1	0
1	0	0	1	0	0	0	0
0	1	1	1	0	0	1	0
1	0	1	1	1	0	1	1
0	0	1	0	1	0	0	1
1
0	0	1	1	1	0	0	0
0	1	0	1	1	0	1	1
1	0	1	0	0	0	0	0
1	1	1	1	1	1	1	1
1	1	0	1	0	1	1	1
1	1	1	0	1	0	1	1
1	0	1	0	1	0	0	0
1	0	1	0	0	0	0	0
1	0	1	1	0	0	0	0
1	0	1	0	1	0	0	1
1	0	1	0	0	0	0	0
0	1	1	1	1	1	1	1
0	0	1	1	0	0	0	0
1	0	1	0	1	0	0	1
0	1	1	1	1	0	1	1
0	0	1	0	1	0	0	0
0	0	1	0	1	0	0	0
1	0	1	1	1	0	0	0
0	1	1	1	1	0	1	1
0
0	1	1	1	1	1	1	0
0	1	1	1	1	1	1	1
0	0	1	1	1	0	0	0
0
0	0	1	1	1	0	0	1
0	0	1	1	0	0	0	0
0	0	1	1	0	0	0	0
0	1	1	1	1	1	1	1
0	1	1	1	0	0	0	0
1	0	1	1	1	0	1	0
0	0	1	1	1	0	1	1
0	1	1	1	1	0	1	1
0	0	1	1	1	0	1	1
0	0	1	0	0	0	0	1
0	0	1	0	1	0	0	0
1	0	1	1	1	0	0	0
0	0	1	1	1	0	0	0
1	1	1	1	1	0	0	1
1
1	0	1	1	1	1	1	1
1	0	1	0	1	1	1	0
0	0	1	0	0	0	0	0
0	0	1	1	0	0	0	0
0	0	1	1	0	0	0	0
1	0	1	1	1	0	1	1
0	0	1	1	0	0	1	0
0	0	1	0	0	1	1	0
0	0	1	0	0	0	0	1
0	0	1	0	1	0	0	0
0	0	1	1	1	0	0	1
0	0	1	1	1	1	1	0
0	0	1	0	1	0	0	0
0	0	1	1	0	0	0	1
0	0	1	1	1	0	0	1
0	0	1	0	0	0	0	0
0	0	1	1	1	0	1	1
0
1	0	1	1	0	0	1	1
1	0	1	1	0	0	0	0
1	0	1	0	1	0	0	0
1	0	1	1	1	0	1	1
0	0	1	1	1	0	1	1
1	1	1	1	0	0	0	0
0	1	1	1	0	1	1	0
0	1	1	1	0	1	1	0
0	0	1	0	1	1	1	1
1	0	1	1	0	0	1	0
0	1	1	1	0	0	1	0
1	1	0	0	0	1	0	0
1	1	1	1	0	0	1	0
0	1	1	1	0	0	1	0
0	1	1	1	0	0	1	0
0	1	1	1	0	0	1	0
1	1	1	1	0	0	1	0
1	1	1	1	0	0	1	0
1	1	1	1	0	0	1	0
0	1	1	1	0	0	1	0
0	0	1	0	1	1	1	1
0	1	1	1	0	0	1	0
1	1	1	1	0	0	1	0
0	1	1	1	0	0	1	0
1
0	0	1	0	1	0	0	1
0
0	0	1	0	0	0	0	1
1
0	0	1	1	0	0	0	0
0	1	1	1	1	1	1	1
1	0	1	1	0	0	0	0
1	1	1	1	1	0	1	1
1	1	1	1	1	1	1	1
0	1	1	1	0	0	1	1
0	0	1	1	0	0	0	0
1	0	1	0	0	0	0	0
1
1	0	1	1	0	0	0	0
0	0	1	0	1	0	0	0
1
1	0	0	1	0	1	1	0
0	1	0	0	0	1	0	0
0	1	1	1	1	1	1	1
0
0	0	1	1	1	1	1	1
0	0	1	1	1	0	0	0
1	1	1	1	0	0	1	0
1
1	0	1	0	0	0	0	1
1
0	0	1	1	0	0	0	1
0	0	1	1	0	0	1	0
0	1	0	1	0	1	0	0
0	0	1	0	1	0	1	0
0	0	1	1	1	0	0	0
0	0	0	1	0	0	0	0
0
1	0	1	1	0	0	0	0
0
1
0
1
0	0	1	1	1	1	1	1
1
0
1
1
0
1
0	1	1	1	1	1	1	1
0	0	1	0	1	0	0	0
0	0	1	1	0	0	0	0
0	0	1	1	0	0	0	0
1	0	0	0	1	0	0	1
0
1	0	1	1	1	0	1	0
1
0
0	1	1	1	1	1	1	1
0	1	1	1	1	1	1	1
1	1	1	1	1	0	0	1
1
0	0	1	1	0	0	0	0
0	0	1	0	0	0	1	0
0
0	0	1	1	0	0	1	0
0	1	1	1	1	1	1	0
1
1	0	1	1	1	1	1	1
1	0	1	0	1	0	0	0
0	1	1	1	0	1	1	1
1	0	1	1	0	0	0	0
1	0	0	1	0	0	1	0
1	0	1	1	0	0	0	0
1
0	1	0	1	0	1	1	0
1	1	1	1	1	1	1	1
0	1	1	1	0	0	0	0
0
0	0	1	1	1	1	1	0
0	0	1	1	0	0	0	0
1	0	1	0	0	0	0	0
0	0	1	1	0	0	0	0
0	0	1	1	0	0	1	0
1	1	1	1	1	1	1	1
0	0	1	1	1	0	0	1
1	1	1	1	1	0	0	0
1	0	1	0	1	0	0	1
1	0	1	0	0	0	0	0
0	1	1	1	1	0	1	0
1	0	1	1	0	1	1	0
0
1	1	1	0	0	0	1	1
0	0	1	1	0	0	0	1
1
1	0	1	1	1	1	1	1
1
1	0	1	1	1	1	1	1
1	0	1	1	1	1	1	0
0	0	1	0	1	0	0	1
0	0	1	0	0	0	0	0
0	0	1	1	0	1	1	0
0	0	0	0	1	0	0	0
1	0	1	1	1	1	1	1
1
0
1	1	1	1	1	0	0	0
1
0	0	1	1	1	0	1	0
0	0	1	1	0	0	0	1
1
1	0	1	0	0	0	0	0
1	1	1	1	1	1	1	0
0	0	0	1	1	1	1	0
1
0	0	1	1	1	0	0	1
0	0	1	1	0	0	0	0
1	1	1	0	0	0	0	0

## Sheet: Prescribed tetanus
Gender	tetanus for ≥ 65 years (P)	tetanus for DM (P)	tetanus for COPD (P)	tetanus for CRF (P)	tetanus for CLD (P)	tetanus for splenectomy (P)
0
1
1	0	0	0	0	0	0
1
1	1	1	1	1	1	1
1	0	0	0	0	0	0
0	0	0	0	0	0	0
0	0	1	0	1	0	0
1	1	1	1	1	0	0
0	1	1	1	1	1	0
0
1	1	0	0	0	0	0
0	1	1	1	0	0	0
0	1	1	0	0	0	0
1	1	1	0	0	0	0
1	1	1	0	0	0	0
0	0	1	0	0	0	0
0
1	1
0	1	1	0	0	0	0
1	1	1	0	0	0	0
0	1	1	1	1	1	1
1	1	1	1	1	1	1
0	1	1	0	0	1	0
1
0	1	1	1	1	1	1
0	1	1	1	1	1	1
1	1	1	1	1	1	1
1	0	0	0	0	0	0
1	1	1	1	1	1	1
1	1	1	1	1	1	0
1	1	0	0	0	0	0
1	1	1	1
1	0	0	0	0	0	0
1	1	0	0	0	0	0
1	1	1	1	1	1	1
0	1	1	1	1	1	1
0	1	1	1	1	1	1
1	0	0	0	0	0	0
0	1	1	1	1	1	1
0	1	0	0	0	0	0
0	1	0	0	0	0	0
1	1	0	0	0	0	0
0	0	0	0	0	0	0
0
0	1	1	1	0	0	0
0	1	0	0	0	0	0
0
0
0	1	1	1	1	1	1
0	0	0	0	0	0	0
0	0	1	1	1	1	0
0	1	1	1	1	1	1
0	1	0	0	0	0	0
1	1	0	0	0	0	0
0	1	1	1	1	1	1
0	1	1	1	1	1	1
0	1	0	0	0	0	0
0	1	1	0	0	1	0
0	0	0	0	0	0	0
1	0	0	0	0	0	0
0	1	1	1	1	1	1
1	0	0	0	0	0	0
1
1
1	0	0	0	0	0	0
0	0	0	0	0	0	0
0	1	1	1	1	1	0
0	1	1	1	1	1	0
1	1	1	1	1	1	1
0	1	1	1	1	1	1
0	0	0	0	0	0	0
0	1	1	0	0	0	0
0	0	0	0	0	0	0
0	0	0	0	0	0	0
0	1	0	0	0	0	0
0	0	0	0	0	0	0
0	1	0	0	0	0	0
0	1	0	0	0	0	0
0	1	1	1	1	1	1
0	0	0	0	0	0	0
0
1	1	1	1	1	1	1
1	0	0	0	0	0	0
1	0	0	0	0	0	0
1	0	0	0	0	0	0
0
1	1	1	1	1	1	0
0	1	1	1	1	1	1
0	1	1	1	1	1	1
0	1	0	0	0	0	0
1	1	0	0	1	0	1
0	1	1	1	1	1	1
1	1	1	1	1	1	1
1	1	1	1	1	1	1
0	1	1	1	1	1	1
0	1	1	1	1	1	1
0	1	1	1	1	1	1
1	1	1	1	1	1	1
1	1	1	1	1	1	1
1	1	1	1	1	1	1
0	1	1	1	1	1	1
0	1	0	0	0	0	0
0	1	1	1	1	1	1
1	1	1	1	1	1	1
0	1	1	1	1	1	1
1	0	0	0	0	0	0
0
0
0	0	0	0	0	0	0
1
0	0	0	0	0	0	0
0	1	1	1	1	1	0
1	1	1	1	1	1	1
1	1	1	1	1	1	1
1	1	1	1	1	1	1
0
0
1
1
1
0	1	1	0	0	0	0
1
1	1	1	1	1	1	0
0	1	1	1		0	1
0	0	0	0	0	0	0
0	1	0	0
0	0	0	0	0	0	0
0	0	0	0	0	0	0
1	1	1	1	1	1	1
1
1	1	1	1	1	1	1
1
0	0	0	0	0	0	0
0	0
0
0	0	0	0	0	0	0
0
0
0
1
0
1
0
1
0	0	0	0	0	0	1
1
0
1
1
0
1
0	1	1	0	1	0	0
0	1	1	1	1	1	1
0	0	1	1	1	1	1
0
1	0	0	0	0	0	0
0
1	1	1	1	1	1	1
1	0	0	0	0	0	0
0
0	1	1	1	1	1	1
0	0	0	0	0	0	0
1	0	0	0	0	0	0
1
0	0	0	0	0	0	0
0	1	1	1	1	1	0
0	1	1	1	0	0	0
0	1	1	1	1	1	1
0	1
1
1	0	0	0	0	0	0
1	0	0	0	0	0	0
0
1	1
1
1
1
0	1	0	0	0	0	0
1	0	0	0	0	0	0
0	1	1	1	1	1	1
0
0	1	1	1	1	1	1
0
1
0	0	0	0	0	0	0
0
1	1	1	1	1	1	1
0	0	0	0	0	0	0
1	1	0		0	0	0
1	1
1
0
1	0	0	0	0	0	0
0
1	0	0	0	0	0	0
0	0	0	0	0	0	0
1
1
1
1	0	0		0	0	0
1	1	0	0	0	0	0
0	0	1	0	0	0	0
0	1
0
0
1	0	0	0	0	0	0
1
0
1	1	1	1	1	1	1
1
0	0	0	0	0	0	0
0	1	0	0	0	1	0
1
1	1	0	0	0	0	0
1	1	1	1	1	1	1
0	0	0	0	0	0	0
1
0	0	0	0	0	0	0
0
1	0	0	0	0	0	0

## Sheet: Prescribed influenza
Gender	influenza for ≥ 65 years (P)	influenza for DM (P)	influenza for COPD (P)	influenza for CRF (P)	influenza for CLD (P)	influenza for splenectomy (P)
0	1	1	1	1	1
1
1	0	0	0	0	0	0
1
1	1	1	1	1	1	1
1	0	0	0	0	0	0
0	0	1	1	0	0	0
0	0	1	0	1	0	0
1	1	1	1	0	0	0
0	1	1	1	1	1	0
0
1	0	0	0	0	0	0
0	1	1	1	0	0	0
0	1	1	1	1	1	0
1	1	1	1	0	0	0
1	1	1	1	1	1	0
0	1	1	1	1	1	0
0
1	0	0	0	0	0	0
0	1	1	1	1	1	0
1	1	1	1	1	1	0
0	1	1	1	1	1	1
1	1	1	1	1	1	1
0	0	1	1	0	0	1
1						1
0	0	0	0	0	0	0
0	1	0	1	0	1	1
1	1	1	1	1	1	1
1	1	1	1	0	0	0
1	1	1	1	1	1	1
1	1	1	1	1	1	1
1	0	0	1	1	0	0
1	1	1
1	0	0	0	0	0	0
1	0	0	0	0	0	0
1	1	1	1	0	0	0
0	1	1	1	0	1	1
0	1	1	1	1	1	1
1	1	0	0	0	0	0
0	1	1	1	1	1	1
0	0	1	1	1	1	0
0	0	0	1	1	0	0
1	1	1	1	1	1	0
0	1	1	1	1	1	0
0
0	1	1	1	1	1	0
0	1	1	1	1	0	0
0			1	1		1
0
0	1	1	1	1	1	1
0	1	1	1	0	0	0
0	1	1	1	1	1	1
0	1	1	1	1	1
0	1	1	1	1	1	1
1	1	1	1	1	1	0
0	1	1	1	1	1	1
0	1	0	1	0	1	1
0	1	1	1	1	1	0
0	0	1	1	0	0	1
0	1	1	1	1	0	0
1	0	0	0	0	0	0
0	0	0	0	0	0	0
1	1	1	1	1	1	1
1
1
1	1	1	1	1	1	0
0	0	0	0	0	0	0
0	1	1	1	1	1	0
0	1	1	1	1	1	0
1	1	1	1	1	1	1
0	1	1	1	1	1	1
0	1	1	1	0	0	0
0	1	0	0	0	0	0
0	1	1	1	0	0	0
0	1	1	1	1	1	0
0	1	1	1	0	0	1
0	0	0	0	0	0	0
0	1	1	1	1	0	0
0	0	0	0	0	0	0
0	0	0	0	0	0	0
0	1	1	1	1	0	0
0
1	1	1	1	1	1	1
1	1	1	1	0	0	0
1	1	1	1	0	0	0
1	1	1	1	0	0	0
0
1	1	1	1	1	1	0
0	1	1	1	1	1	1
0	1	1	1	1	1	1
0	1	0	1	0	1	0
1	1	1	1	1	1	1
0	1	1	1	1	1	1
1	1	1	1	1	1	1
1	1	1	1	1	1	1
0	1	1	1	1	1	1
0	1	1	1	1	1	1
0	1	1	1	1	1	1
1	1	1	1	1	1	1
1	1	1	1	1	1	1
1	1	1	1	1	1	1
0	1	1	1	1	1	1
0	1	0	1	0	1	0
0	1	1	1	1	1	1
1	1	1	1	1	1	1
0	1	1	1	1	1	1
1	0	0	0	0	0	0
0
0
0	0	1	1	0	0	0
1
0	1	1	1	1	0	0
0	1	1	1	1	1	0
1	1	1	1	1	1	1
1	1	1	1	1	1	1
1	1	1	1	1	1	1
0	1		1	1
0
1	1	1
1
1
0	1	0	1	0	0	0
1
1	1	1	1	1	1	1
0	1	1	1	1	1	1
0	1	1	1	1
0	1	1	1	1
0	1	1	1	1	0	0
0	1	1	1	1	1	1
1	1	1	1	1	1	1
1
1	1	1	1	1	1	1
1
0	1	1	0	0	0	0
0	1	1	1	1
0
0	1	1	1	1	1	0
0	1	1	1	1	1
0			1	1
0
1	0	0	0	0	0	0
0
1
0
1
0	1	1	1	1	1	1
1
0
1
1	1	1	1	1
0
1
0	1	1	1	1	1	0
0	1	0	0	0	0	0
0	1	1	1	1	1	0
0
1	1	0	0	0	0	0
0
1	1	1		0	1	1
1	0	0	0	0	0	0
0
0	1	1	1	1	1	1
0	1	1	1	0	0	0
1	0	0	0	0	0	0
1
0	1	1	1	1	1	0
0	1	1				0
0	0	1	1	1	1	1
0	1	1	1	1	1	1
0	1	1	1	1	1	0
1
1	0	0	0	0	0	0
1	0	1	1	1
0
1	1	1	1	1	1	1
1
1	1	1	1	1	1	1
1
0	1	1	1	1	1	1
1	0	0	0	0	0	0
0	1	1	1	1	1	1
0
0	1	1	1	1	1	1
0
1
0	1	1	1	1	0	0
0
1	1	1	1	1	1	1
0	1	1	1	1	0	0
1	1	1	1	1		0
1	1	1	1	1	1
1
0		1	1	1	1
1	0	0	0	0	0	0
0
1	1	1	1	1	0	0
0	1	1	1	1	1	0
1
1	1	1	1	1
1
1	1	1	1	1
1	1	1	1	0	0	0
0	1	1	0	1	0	0
0	1	1	1	1
0
0
1	0	0	0	0	0	0
1
0
1	1	0	1	1	1	1
1
0	1	0	1	0	0	0
0	1	1	1	1	1	1
1
1	1	1	1	1	1	1
1	1	1	1	1	1	1
0	0	0	0	0	0	0
1
0	0	0	0	0	0	0
0
1	0	0	0	0	0	0

## Sheet: prescribed HBV
Gender	hepatitis B for ≥ 65 years (P)	hepatitis B for DM (P)	hepatitis B for COPD (P)	hepatitis B for CRF (P)	hepatitis B for CLD (P)	hepatitis B for splenectomy (P)
0
1
1	0	0	0	0	0	0
1
1	1	1	1	1		1
1	0	0	0	0	0	0
0	0	1	0	1	0	0
0	0	1	0	1	0	0
1	1	1	1	1	0	0
0	1	1	1	1	0	0
0
1	1	1	1	1	1	0
0	1	1	1	0	1	0
0	1	1	1	1	1	0
1	1	1	1	1	1	0
1	1	1	1	1	0	0
0	0	0	0	0	0	0
0
1	0	0	0	0	0	0
0	1	1	1	1	1	0
1	1	1	1	1	1	0
0	1	1	1	1	1	1
1	1	1	1	1	1	1
0	0	0	0	1	1	0
1
0	1	1	1	1	1	1
0	1	1	1	1	1	1
1	1	0	1	1	1	1
1	0	0	0	1	1	0
1	1	1	1	1	1	1
1	1	1	1	1	1	1
1	1	0	0	0	1	0
1	1	1	1
1	0	0	0	0	0	0
1	0	0	0	0	0	0
1	1	1	1	1	1	1
0	1	1	0	0	0	0
0	1	1	1	1	1	1
1	0	0	0	0	0	0
0	1	1	1	1	1	1
0	1	0	0	0	1	0
0	1	0	0	0	1	0
1	0	0	0	0	0	0
0	0	0	0	0	0	0
0
0	0	0	0	0	1	0
0	0	0	0	0	0	0
0	0	0	0	0	0	0
0
0	1	1	1	1	1	1
0	0	1	0	0	0	0
0	0	0	0	0	0	0
0	1	1	1	1	1	1
0	1	1	1	1	0	1
1	0	0	0	0	0	0
0	1	1	1	1	1	1
0	1	1	1	1	1	1
0	1	1	1	1	1	1
0	0	0	0	1	1	0
0	0	0	0	0	0	0
1	0	0	0	0	0	0
0	1	1	1	1	1	1
1	1	1	1	1	1	1
1
1
1	1	0	0	0	0	0
0	0	0	0	0	0	0
0	0	0	0	0	0	0
0	0	0	0	1	0	0
1	1	1	1	1	1	1
0	1	1	1	1	1	1
0	1	1	1	1	1	1
0	0	0	0	0	0	0
0	0	0	0	0	0	0
0	0	0	0	0	0	0
0	0	0	0	0	0	0
0	0	0	0	0	0	0
0	0	0	1	0	0	0
0	0	0	0	0	0	0
0	0	0	0	0	0	0
0	0	0	0	1	1	0
0
1	1	1	1	1	1	1
1	0	0	0	0	0	0
1	0	0	0	0	1	0
1	0	0	0	0	0	0
0
1	1	1	1	1	1	0
0	1	1	1	1	1	1
0	1	1	1	1	1	1
0	1	1	1	1	1	1
1	1	1	1	1	1	1
0	1	1	1	1	1	1
1	1	1	1	1	1	1
1	1	1	1	1	1	1
0	1	1	1	1	1	1
0	1	1	1	1	1	1
0	1	1	1	1	1	1
1	1	1	1	1	1	1
1	1	1	1	1	1	1
1	1	1	1	1	1	1
0	1	1	1	1	1	1
0	1	0	0	0	1	0
0	1	1	1	1	1	1
1	1	1	1	1	1	1
0	1	1	1	1	1	1
1
0	1	0	0	0	1	0
0
0	0	0	0	0	0	0
1
0	0	0	0	0	0	0
0	1	1	1	1	1	0
1	1	0	1	1	1	0
1	1	1	1	1	1	1
1	1	1	1	1	1	1
0				1
0
1
1
1
0	1	0	0	0	0	0
1
1	1	1	1	1	1	1
0	1	1	1	1	1	1
0	0	0	0	0	0	0
0	1
0	0	0	0	0	0	0
0	1	0	0	0	0	0
1	1	1	1	1	1	1
1
1	1	1	1	1	1	1
1
0	0	0	0	0	0	0
0
0
0	0	0	0	0	0	0
0	0	0	0	0	0	0
0
0
1	0	0	0	0	0	0
0
1
0
1
0	1	1	1	1	1	1
1
0
1
1
0
1
0	0	1	0	1	0	0
0	1	1	1	1	1	1
0	1	1	1	0	0	0
0
1	0	0	0	0	0	0
0
1	0	1	1	1	1	1
1	0	0	0	0	0	0
0
0				1		1
0	0	0	0	0	0	0
1	0	0	0	0	0	0
1
0	0	0	0	0	0	0
0				1	1
0	0	0	0	0	0	0
0	1	1	1	1	1	1
0				1	1
1
1	0	0	0	0	0	0
1	0	0	0	0	0	0
0
1	0				1
1
1
1
0	1	0	0	0	0	0
1	0	0	0	0	0	0
0	1	1	1	1	1	1
0
0	1	1	1	1	1	1
0
1
0	0	0	0	0	1	0
0
1	1	1	1	1	1	1
0	0	0	0	0	0	0
1	0	0	0	0	0	0
1	1	1	1	1	1	1
1
0
1	0	0	0	0	0	0
0
1	0	0	0	1	0	0
0	0	0	0	0	0	0
1
1
1
1	0	0	1	0		0
1	0	0	0	0	0	0
0	0	0	0	0	1	0
0	1
0
0
1	0	0	0	0	0	0
1
0
1	1	1	0	0	0	0
1
0	0	0	0	0	0	0
0	1	1	1	1	1	1
1
1	0	0	0	0	0	0
1	1	1	1	1	1	1
0	0	0	0	0	0	0
1
0	0	0	0	0	0	0
0
1

[truncated: 4 more sheets: prescribed HAV, prescribed pneumococcal, prescribed meningococcal, prescribed H.influenza]
